# Supplementary material
Source: PubMed Central journal article supplement (PMC7791324)
Supplement: 41415_2020_2505_MOESM1_ESM.pdf [file 41415_2020_2505_MOESM1_ESM.pdf]

Supplementary Information: full list of articles included in the literature review

| Study number | Authors                                                      | Title of article                                                                                                                                             | Source              | Year |
|--------------|--------------------------------------------------------------|--------------------------------------------------------------------------------------------------------------------------------------------------------------|---------------------|------|
| #1           | Kenny KP,<br>Alkazame AM &<br>Day PF                         | The effect of viewing video clips of paediatric local anaesthetic administration on the confidence of undergraduate dental students                          | Eur J Dent Educ     | 2018 |
| #2           | Davies BR, Leung AN, Dillon J & Blum IR                      | Bespoke video vignettes-an approach to enhancing reflective learning developed by dental undergraduates and their clinical teachers                          | Eur J Dent Educ     | 2017 |
| #3           | Bains M, Reynolds PA, McDonald F & Sherriff M                | Effectiveness and acceptability of face-to-face, blended and e-learning: a randomised trial of orthodontic undergraduates                                    | Eur J Dent Educ     | 2011 |
| #4           | Crothers AJ, Bagg J & McKerlie                               | The Flipped Classroom for pre-clinical dental skills teaching- a reflective commentary                                                                       | Br Dent J           | 2017 |
| #5           | Lone M, McKenna JP, Cryan JF, Vagg T, Toulouse A & Downer EJ | Evaluation of an animation tool developed to supplement dental student study of the cranial nerves                                                           | Eur J Dent Educ     | 2018 |
| #6           | Plessas A                                                    | Computerized Virtual Reality Simulation in Preclinical Dentistry: can a Computerized Simulator Replace the Conventional Phantom Heads and Human Instruction? | Simul Healthc       | 2017 |
| #7           | Shahari-Rad A, Cox M, & Woolford M                           | Clinical Skills Acquisition: Rethinking Assessment Using a Virtual Haptic Simulator                                                                          | Technol Knowl Learn | 2017 |
| #8           | Al-Saud LM, Mushtaq F, Allsop MJ, Culmer PC,                 | Feedback and motor skill acquisition using a haptic dental simulator                                                                                         | Eur J Dent Educ     | 2017 |

|      |                                                                                |                                                                                                                                                       |                 |      |
|------|--------------------------------------------------------------------------------|-------------------------------------------------------------------------------------------------------------------------------------------------------|-----------------|------|
|      | Mirghani I, Yates E<br>et al                                                   |                                                                                                                                                       |                 |      |
| #9   | Durham JA,<br>Brettell S,<br>Summerside C,<br>McHanwell S                      | Evaluation of a virtual anatomy course for<br>clinical undergraduates                                                                                 | Eur J Dent Educ | 2009 |
| #10  | San Diego JP, Cox<br>MJ, Quinn BFA,<br>Newton JT,<br>Banerjee A,<br>Woolford M | Researching haptics in higher education: the<br>complexity of developing haptic learning<br>systems and evaluating its impact on students<br>learning | Comput Educ     | 2012 |
| #11  | Martin N,<br>Fairclough A,<br>Smith M, Ellis L                                 | Factors influencing the quality of<br>undergraduate clinical restorative dentistry in<br>the UK and ROI:views from heads of units                     | Br Dent J       | 2010 |
| # 12 | Heasman PA,<br>Witter J, Preshaw<br>PM                                         | Periodontology in the undergraduate<br>curriculum in UK dental schools                                                                                | Br Dent J       | 2015 |
| #13  | Clark RKF,<br>Radford DR,<br>Juszczuk AS                                       | Current trends in removable partial denture<br>teaching in British dental schools                                                                     | Br Dent J       | 2011 |
| # 14 | Lone M, McKenna<br>JP, Cryan JF,<br>Downer EJ<br>&Toulouse A                   | A survey of tooth morphology teaching<br>methods employed in the United Kingdom and<br>Ireland                                                        | Eur J Dent Educ | 2018 |
| #15  | Ali K, McArthy A,<br>Robbins J,<br>Heffernan E,<br>Coombes L                   | Management of impacted wisdom<br>teeth:teaching of undergraduate students in UK<br>dental schools                                                     | Eur J Dent Educ | 2014 |

|     |                                                   |                                                                                                                                             |                 |      |
|-----|---------------------------------------------------|---------------------------------------------------------------------------------------------------------------------------------------------|-----------------|------|
| #16 | Maccluskey M,<br>Durham J                         | Oral surgery undergraduate teaching and experience in the United Kingdom: a national survey                                                 | Eur J Dent Educ | 2009 |
| #17 | Lynch CD,<br>Singhrao H, Addy LD, Gilmour ASM     | The teaching of fixed partial dentures in undergraduate dental schools in Ireland and the United Kingdom                                    | J Oral Rehabil  | 2010 |
| #18 | Addy LD, Lynch CD, Locke M, Watts A, Gilmour ASM  | The teaching of implant dentistry in undergraduate dental schools in the United Kingdom and Ireland                                         | Br Dent J       | 2008 |
| #19 | Blum IR,<br>O'Sullivan DJ,<br>Jagger DC           | A survey of undergraduate education in dental implantology in UK dental schools                                                             | Eur J Dent Educ | 2008 |
| #20 | Coelho C, Pooler J,<br>Lloyd H                    | Using patients as educators for communication skills: exploring dental students' and patients' views                                        | Eur J Dent Educ | 2017 |
| #21 | Himida T,<br>Nanjappa S, Yuan S, Freeman R        | Dental students' perceptions of learning communication skills in a forum theatre-style teaching session on breaking bad news                | Eur J Dent Educ | 2018 |
| #22 | Abu Eid R, Ewan K, Foley J, Oweis Y, Jayasinghe J | Self-directed study and carving tooth models for learning tooth morphology: perceptions of students at the University of Aberdeen, Scotland | J Dent Educ     | 2013 |
| #23 | Hanson C,<br>Wilkinson T,<br>Macluskey M          | Do dental undergraduates think that Thiel-embalmed cadavers are a more realistic model for teaching exodontia?                              | Eur J Dent Educ | 2018 |
| #24 | Ali K, Heffernan E,<br>Lambe P, Coombes           | Use of peer assessment in tooth extraction competency                                                                                       | Eur J Dent Educ | 2014 |

|     |                                                                                            |                                                                                                                                            |                 |      |
|-----|--------------------------------------------------------------------------------------------|--------------------------------------------------------------------------------------------------------------------------------------------|-----------------|------|
| #25 | McKerlie RA,<br>Cameron DA,<br>Sherriff A, Bovill<br>C                                     | Student Perceptions of syndicate learning:<br>tutor-less group work within an undergraduate<br>dental curriculum                           | Eur J Dent Educ | 2011 |
| #26 | Tricio J, Woolford<br>M, Thomas M,<br>Lewis-Greene H,<br>Georghiou L,<br>Andiappan M et al | Dental students' peer assessment: a prospective<br>pilot study                                                                             | Eur J Dent Educ | 2015 |
| #27 | Craddock HL                                                                                | An Evaluation of student, patient and<br>practitioner experience of general dental<br>practice placements                                  | Br Dent J       | 2011 |
| #28 | Lynch CD, Ash PJ<br>& Chadwick BL                                                          | Student perspectives and opinions on their<br>experience at an undergraduate outreach dental<br>teaching centre at Cardiff: a 5-year study | Eur J Dent Educ | 2010 |
| #29 | Smith M, Lennon<br>MA, Robinson PG                                                         | Students' clinical experience on outreach<br>placements                                                                                    | Eur J Dent Educ | 2010 |
| #30 | Sweet J, Pugsley L,<br>Wilson J                                                            | Stakeholder perceptions of chairside teaching<br>and learning in one UK dental school                                                      | Br Dent J       | 2008 |
| #31 | Sweet J, Wilson J,<br>Pugsley L                                                            | Chairside teaching and the perceptions of<br>dental teachers in the UK                                                                     | Br Dent J       | 2008 |
| #32 | Wilson J, Sweet J,<br>Pugsley L                                                            | Developmental guidelines for good chairside<br>teaching-a consensus report from two<br>conferences                                         | Eur J Dent Educ | 2015 |
| #33 | Scally KJ, Wilson<br>KE, Girdler NM                                                        | A study of dental students' clinical knowledge<br>acquisition and experiences in conscious<br>sedation                                     | Br Dent J       | 2015 |

|     |                                                                                  |                                                                                                                                                      |                                                                                             |      |
|-----|----------------------------------------------------------------------------------|------------------------------------------------------------------------------------------------------------------------------------------------------|---------------------------------------------------------------------------------------------|------|
| #34 | Foley JI,<br>Richardson GL,<br>Drummie J                                         | Agreement among dental students, peer assessors and tutor in assessing students' competence in Preclinical skills                                    | J Dent Educ                                                                                 | 2015 |
| #35 | San Diego JP,<br>Newton T, Quinn BFa, Cox MJ,<br>Woolford MJ                     | Levels of agreement between student and staff assessments of clinical skills in performing cavity preparation in artificial teeth                    | Eur J Dent Educ                                                                             | 2014 |
| #36 | Davies B, Leung A, Dunne S                                                       | So how do you see our teaching? Some observations received from past and present students at the Maurice Wohl Dental Centre                          | Eur J Dent Educ                                                                             | 2012 |
| #37 | Mirghani I,<br>Mushtaq F, Allsop MJ, Al-Saud LM,<br>Tickhill N. Potter C et al   | Capturing differences in dental training using a virtual reality simulator                                                                           | Eur J dent Educ                                                                             | 2018 |
| #38 | Barbour M                                                                        | Electronic voting in Dental Materials Education: the impact on students' attitudes and exam performance                                              | J Dent Educ                                                                                 | 2008 |
| #39 | Holland c                                                                        | What role do alternative realities play in educating dentists?                                                                                       | Br Dent J                                                                                   | 2018 |
| #40 | Robb N, Leitch J,<br>O'Brian C, Walker P                                         | Pre-doctoral teaching in IV conscious sedation: ten years at Glasgow Dental school                                                                   | J Dent Educ                                                                                 | 2013 |
| #41 | Cox M, Quinn B,<br>Shahriari-Rad A,<br>Woolford M, San Diego J, Butchers C et al | An investigation into the teaching of Injection Procedures in Dental Education and other Clinical skills Programmes using a Virtual Haptic simulator | 40 <sup>th</sup> annual conference of the Association for Dental education in Europe (Riga) | 2014 |

|     |                                                                                   |                                                                                                                                                                   |                  |      |
|-----|-----------------------------------------------------------------------------------|-------------------------------------------------------------------------------------------------------------------------------------------------------------------|------------------|------|
| #42 | Vernazza C,<br>Durham J, Ellis J,<br>Teasdale D,<br>Cotterill S, Scott L<br>et al | Introduction of an e-portfolio in clinical<br>dentistry: staff and student views                                                                                  | Eur J Dent Educ  | 2011 |
| #43 | Eaton KA,<br>Reynolds Pa,<br>Grayden SK,<br>Wilson NHF                            | A vision of dental education in the third<br>millenium                                                                                                            | Br Dent J        | 2008 |
| #44 | Reynolds PA,<br>Mason R, Eaton<br>KA                                              | Remember the days in the old school yard:<br>from lectures to online learning                                                                                     | Br Dent J        | 2008 |
| #45 | Feeney L,<br>Reynolds PA,<br>Harper J                                             | A description of the new technologies used in<br>transforming dental education                                                                                    | Br Dent J        | 2008 |
| #46 | Puryer J, Woods K,<br>Terry J, Sandy J,<br>Ireland AJ                             | The confidence of undergraduate dental<br>students when carrying out prosthodontic<br>treatment and their perception of the quality of<br>prosthodontic education | Eur J Dent Educ  | 2018 |
| #47 | Neville P                                                                         | Introducing dental students to reflective<br>practice: a dental educator's reflections                                                                            | Reflective Pract | 2018 |
| #48 | Bush H, Bissell V                                                                 | The evaluation of an approach to reflective<br>learning in the undergraduate dental curriculum                                                                    | Eur J Dent Educ  | 2008 |
| #49 | Field JC, Zhang E,<br>Milke V, McCance<br>S, Worts C, Stone<br>SJ et al           | Patterns of verbal interaction and student<br>satisfaction within a clinical setting: A video-<br>enhanced observational study                                    | Eur J Dent Educ  | 2018 |
| #50 | Davey J, Bryant<br>ST, Dummer PMH                                                 | The confidence of undergraduate dental<br>students when performing root canal treatment                                                                           | Eur J Dent Educ  | 2015 |

|     |                                                                          |                                                                                                                                 |                 |      |
|-----|--------------------------------------------------------------------------|---------------------------------------------------------------------------------------------------------------------------------|-----------------|------|
|     |                                                                          | and their perception of the quality of endodontic education                                                                     |                 |      |
| #51 | Gilmour ASM,<br>Welply A, Cowpe JG, Bullock AD,<br>Jones RJ              | The undergraduate perception of dentists: confidence levels of final year dental students at the School of Dentistry in Cardiff | Br Dent J       | 2016 |
| #52 | Macluskey M,<br>Durham J, Bell A,<br>Cowpe J, Crean St J, Dargue A et al | National survey of UK final year students' opinion of undergraduate oral surgery teaching                                       | Eur J Dent Educ | 2011 |
| #53 | Craddock HL,<br>Carry JA, Kelly S                                        | Integrated teaching of basic and clinical sciences in anxiety and pain management                                               | Eur J Dent Educ | 2009 |
| #54 | Lynch CD, Ash PJ,<br>Chadwick BL                                         | Current trends in community-Based clinical teaching programs in U.K. and Ireland Dental Schools                                 | J Dent Educ     | 2012 |
| #55 | Radford DR,<br>Holmes S,<br>Woolford MJ,<br>Dunne SM                     | The impact of integrated team care taught using a live NHS contract on the educational experience of final year dental students | Br Dent J       | 2014 |
| #56 | Radford DR,<br>Hellyer P                                                 | Dental students' perceptions of their experience at a residential outreach centre                                               | Br Dent J       | 2015 |
| #57 | Radford DR,<br>Hellyer P                                                 | Empowerment in a model of outreach undergraduate dental education                                                               | Br Dent J       | 2017 |
